# Supplementary material for: Genome sequence, population history, and pelage genetics of the endangered African wild dog (Lycaon pictus)
Source: BMC Genomics. 2016 Dec 9;17:1013. doi: 10.1186/s12864-016-3368-9 (PMC5148847; doi:10.1186/s12864-016-3368-9)
Supplement: Additional file 10: — Genic effects of Lycaon MSY coding sequence variants. (XLSX 55 kb) [file 12864_2016_3368_MOESM10_ESM.xlsx]

## Sheet: CDS_SNPs_SouthAfrican_Y
Substitution	Sequence coordinate	Gene	Codon change	Amino acid change	Protein effect
A -> G	1051505	BCORY	AAA -> AAG		None
C -> T	1073077	BCORY	AGC -> AGT		None
A -> G	1051471	BCORY	CAG -> CGG	Q -> R	Substitution
A -> T	1051519	BCORY	AAG -> ATG	K -> M	Substitution
G -> A	1054157	BCORY	GGT -> GAT	G -> D	Substitution
C -> A	1073065	BCORY	AAC -> AAA	N -> K	Substitution
C -> G	1075933	BCORY	CAG -> GAG	Q -> E	Substitution
C -> A	891304	CYorf15	CGG -> CGT		None
A -> G	884362	CYorf15	TGT -> TGC		None
T -> C	891219	CYorf15	AGC -> GGC	S -> G	Substitution
G -> T	866026	CYorf15	CTT -> ATT	L -> I	Substitution
G -> A	864113	CYorf15	CTT -> TTT	L -> F	Substitution
G -> A	853082	CYorf15	GCT -> GTT	A -> V	Substitution
A -> G	852981	CYorf15	TCC -> CCC	S -> P	Substitution
G -> T	244131	DDX3Y	GCC -> GCA		None
C -> T	242624	DDX3Y	TGA -> TAA		None
C -> T	491579	HSFY	TCC -> TCT		None
C -> T	491659	HSFY	ACT -> ATT	T -> I	Substitution
C -> T	493165	HSFY	TCT -> TTT	S -> F	Substitution
T -> G	941592	RBMYL	GGA -> GGC		None
G -> T	938340	RBMYL	GGC -> GGA		None
A -> G	931811	RBMYL	TAT -> TAC		None
T -> C	941034	RBMYL	CAG -> CGG	Q -> R	Substitution
T -> C	936787	RBMYL	AAG -> AGG	K -> R	Substitution
A -> G	936716	RBMYL	TCT -> CCT	S -> P	Substitution
G -> A	936710	RBMYL	CCT -> TCT	P -> S	Substitution
T -> C	936703	RBMYL	CAT -> CGT	H -> R	Substitution
G -> C	933006	RBMYL	CGA -> GGA	R -> G	Substitution
A -> G	932994	RBMYL	TAT -> CAT	Y -> H	Substitution
T -> G	931875	RBMYL	GAT -> GCT	D -> A	Substitution
T -> C	931227	RBMYL	AAT -> AGT	N -> S	Substitution
T -> A	931222	RBMYL	AAT -> TAT	N -> Y	Substitution
G -> T	931212	RBMYL	TCC -> TAC	S -> Y	Substitution
C -> T	931195	RBMYL	GGA -> AGA	G -> R	Substitution
T -> C	931128	RBMYL	CAT -> CGT	H -> R	Substitution
T -> C	930993	RBMYL	CAT -> CGT	H -> R	Substitution
C -> T	1131588	UBE1Y	GAC -> GAT		None
T -> C	1131714	UBE1Y	CCT -> CCC		None
A -> G	1132716	UBE1Y	ACA -> ACG		None
T -> C	1135159	UBE1Y	CCT -> CCC		None
G -> A	1136908	UBE1Y	CCG -> CCA		None
T -> A	1138956	UBE1Y	GCT -> GCA		None
C -> T	1139040	UBE1Y	CAC -> CAT		None
T -> C	1142058	UBE1Y	ACT -> ACC		None
T -> C	1142216	UBE1Y	ACT -> ACC		None
G -> A	1142282	UBE1Y	CGG -> CGA		None
T -> C	1142536	UBE1Y	GTT -> GTC		None
A -> G	1127621	UBE1Y	GAA -> GGA	E -> G	Substitution
C -> A	1127773	UBE1Y	CAA -> AAA	Q -> K	Substitution
G -> T	1127942	UBE1Y	GCA -> TCA	A -> S	Substitution
A -> G	1127945	UBE1Y	ATG -> GTG	M -> V	Substitution
T -> A	1129342	UBE1Y	CAT -> CAA	H -> Q	Substitution
G -> A	1131592	UBE1Y	GCA -> ACA	A -> T	Substitution
C -> G	1134724	UBE1Y	GAC -> GAG	D -> E	Substitution
G -> T	1134731	UBE1Y	GCT -> TCT	A -> S	Substitution
T -> C	1134741	UBE1Y	GTG -> GCG	V -> A	Substitution
A -> G	1134792	UBE1Y	GAA -> GGA	E -> G	Substitution
C -> A	1135114	UBE1Y	GAC -> GAA	D -> E	Substitution
T -> G	1138805	UBE1Y	ATC -> AGC	I -> S	Substitution
A -> G	1138816	UBE1Y	AAC -> GAC	N -> D	Substitution
C -> A	1141153	UBE1Y	TCT -> TAT	S -> Y	Substitution
A -> C	1141467	UBE1Y	TTA -> TTC	L -> F	Substitution
G -> A	1142451	UBE1Y	AGC -> AAC	S -> N	Substitution
A -> G	1142495	UBE1Y	ATC -> GTC	I -> V	Substitution
A -> G	1142553	UBE1Y	CAA -> CGA	Q -> R	Substitution
C -> T	1132684	UBE1Y			Truncation
T -> C	382446	USP9Y	CTA -> CTG		None
G -> C	358657	USP9Y	CCC -> CCG		None
A -> G	353516	USP9Y	TTG -> CTG		None
A -> G	340713	USP9Y	TCT -> TCC		None
A -> G	310204	USP9Y	TAT -> TAC		None
C -> G	292930	USP9Y	CCG -> CCC		None
C -> T	284527	USP9Y	CCG -> CCA		None
C -> A	280752	USP9Y	TCG -> TCT		None
T -> A	388130	USP9Y	ACA -> TCA	T -> S	Substitution
T -> C	386230	USP9Y	AAT -> GAT	N -> D	Substitution
G -> C	358598	USP9Y	ACT -> AGT	T -> S	Substitution
T -> C	340817	USP9Y	ACA -> GCA	T -> A	Substitution
G -> T	335497	USP9Y	CCC -> CAC	P -> H	Substitution
C -> A	290422	USP9Y	CAG -> CAT	Q -> H	Substitution
T -> A	284478	USP9Y	ACT -> TCT	T -> S	Substitution
G -> C	276004	USP9Y			Truncation
C -> T	657625	ZFY	ACG -> ACA		None
G -> A	654420	ZFY	CAC -> CAT		None
A -> T	653619	ZFY	GTT -> GTA		None
C -> T	666008	ZFY	GCT -> ACT	A -> T	Substitution
G -> C	665585	ZFY	CCT -> GCT	P -> A	Substitution
